# Supplementary material for: Tunable energy storage capacity of two-dimensional Ti3C2Txmodified by a facile two-step pillaring strategy for high performance supercapacitor electrodes
Source: Royal Society of Chemistry journal article supplement (doi:10.1039/c9nr07259d), 2019-01-01
Supplement: c9nr07259d1.pdf [file c9nr07259d1.pdf]

## Supporting Information

### **Tunable energy storage capacity of two-dimensional $Ti_3C_2T_x$ modified by a facile two-step pillaring strategy for high performance supercapacitor electrodes**

Yahui Li<sup>1</sup>, Yanan Deng<sup>1</sup>, Jianfeng Zhang<sup>1\*</sup>, Ye Han<sup>2\*</sup>, Weiwei Zhang<sup>1</sup>, XiaoYan  
Yang<sup>1</sup>, Xin Zhang<sup>1</sup>, Wan Jiang<sup>3</sup>

<sup>1</sup>College of Mechanics and Materials, Hohai University, Nanjing 211100, China

<sup>2</sup>School of Materials Science and Engineering, Shandong University of Science and  
Technology, Qingdao, Shandong 266590, China

<sup>3</sup>College of Materials Science and Engineering, Donghua University, Shanghai  
210050, China

\*Corresponding authors, email address: jfzhang@hhu.edu.cn, hanye@sdu.edu.cn

Table S1 The cationic property and the d-spacing values

|                              | Positive charge | Ionic radius(Å) | 2θ(°) | d-spacing(Å) | The number of fixed groups |
|------------------------------|-----------------|-----------------|-------|--------------|----------------------------|
| Li <sup>+</sup>              | 1               | 0.76            | 8.22  | 10.75        | 2                          |
| K <sup>+</sup>               | 1               | 1.38            | 7.08  | 12.48        | 2                          |
| NH <sub>4</sub> <sup>+</sup> | 1               | 1.43            | 6.96  | 12.69        | 4<X<6                      |
| Mg <sup>2+</sup>             | 2               | 0.72            | 7.30  | 12.10        | 4                          |
| Ca <sup>2+</sup>             | 2               | 1.00            | 7.24  | 12.20        | 4                          |
| Al <sup>3+</sup>             | 3               | 0.535           | 7.02  | 12.58        | 6                          |

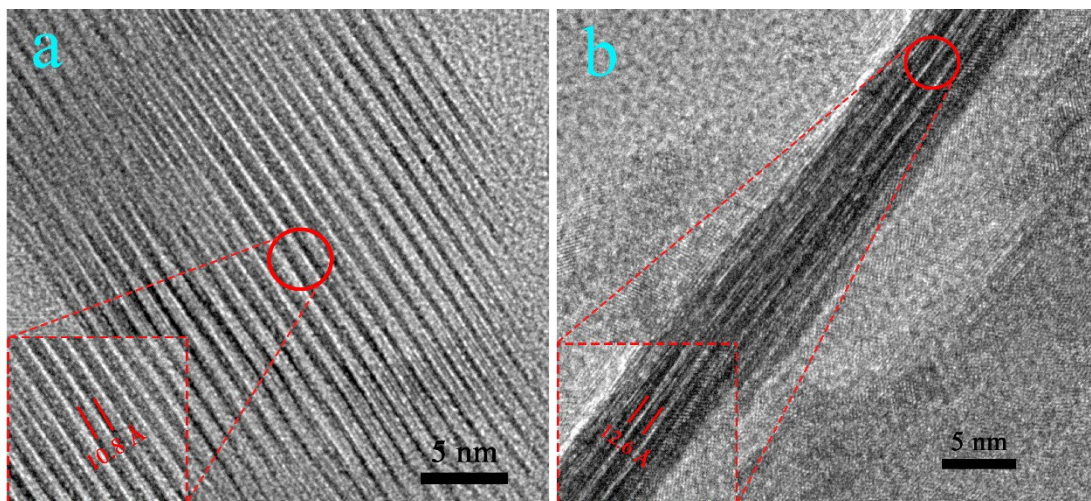

Fig. S1 HRTEM of  $\text{Ti}_3\text{C}_2\text{T}_x\text{-Li}^+$ ; (b)  $\text{Ti}_3\text{C}_2\text{T}_x\text{-Al}^{3+}$

The HRTEM of  $\text{Ti}_3\text{C}_2\text{T}_x\text{-Li}^+$  and  $\text{Ti}_3\text{C}_2\text{T}_x\text{-Al}^{3+}$  is shown in the Fig. S1. The apparent layered structure is presented, and the test results are consistent with XRD

Table S2 Bonding ratio in Ti 2p of the similar pillared modified  $\text{Ti}_3\text{C}_2\text{T}_x$

|                 | $\text{Ti}_3\text{C}_2\text{T}_x\text{-Li}^+$ | $\text{Ti}_3\text{C}_2\text{T}_x\text{-K}^+$ | $\text{Ti}_3\text{C}_2\text{T}_x\text{-NH}_4^+$ | $\text{Ti}_3\text{C}_2\text{T}_x\text{-Mg}^{2+}$ | $\text{Ti}_3\text{C}_2\text{T}_x\text{-Ca}^{2+}$ | $\text{Ti}_3\text{C}_2\text{T}_x\text{-Al}^{3+}$ |
|-----------------|-----------------------------------------------|----------------------------------------------|-------------------------------------------------|--------------------------------------------------|--------------------------------------------------|--------------------------------------------------|
| Ti-C $2p^{3/2}$ | 46%                                           | 37%                                          | 40%                                             | 45%                                              | 54%                                              | 45%                                              |
| Ti-O $2p^{3/2}$ | 29%                                           | 38%                                          | 38%                                             | 27%                                              | 41%                                              | 30%                                              |
| Ti-C $2p^{1/2}$ | 24%                                           | 18%                                          | 21%                                             | 27%                                              | 42%                                              | 22%                                              |
| Ti-O $2p^{1/2}$ | 1%                                            | 8%                                           | 2%                                              | 2%                                               | 0                                                | 4%                                               |

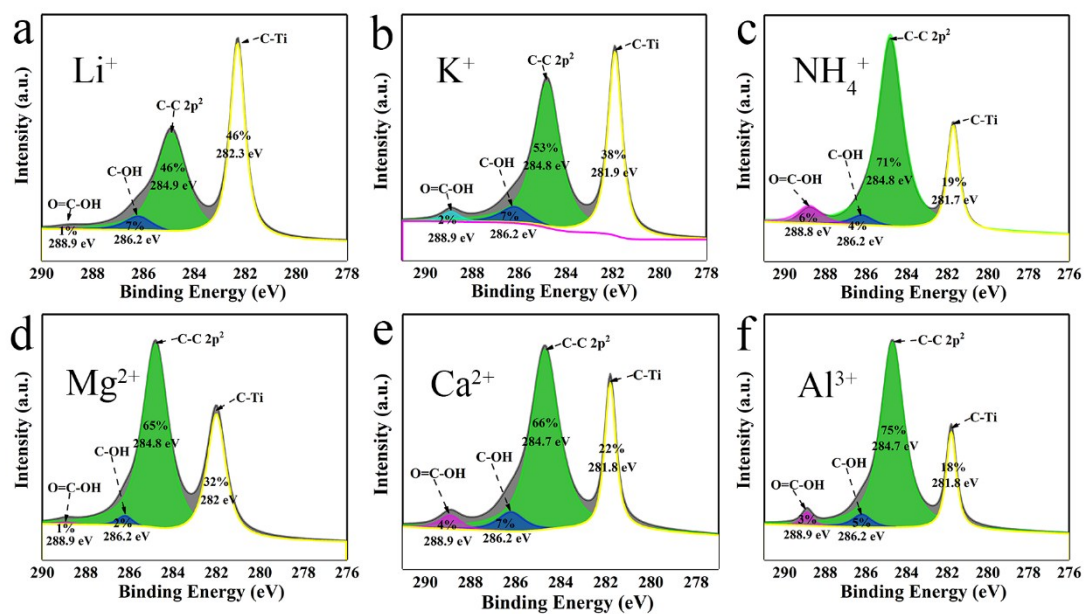

Fig. S2 C 1s spectra of (a)  $\text{Ti}_3\text{C}_2\text{T}_x\text{-Li}^+$ . (b)  $\text{Ti}_3\text{C}_2\text{T}_x\text{-K}^+$ . (c)  $\text{Ti}_3\text{C}_2\text{T}_x\text{-NH}_4^+$ . (d)  $\text{Ti}_3\text{C}_2\text{T}_x\text{-Mg}^{2+}$ . (e)  $\text{Ti}_3\text{C}_2\text{T}_x\text{-Ca}^{2+}$ . (f)  $\text{Ti}_3\text{C}_2\text{T}_x\text{-Al}^{3+}$ .

Table S3 Bonding ratio in C 1s of the similar pillared modified  $\text{Ti}_3\text{C}_2$

|                     | $\text{Ti}_3\text{C}_2\text{T}_x\text{-Li}^+$ | $\text{Ti}_3\text{C}_2\text{T}_x\text{-K}^+$ | $\text{Ti}_3\text{C}_2\text{T}_x\text{-NH}_4^+$ | $\text{Ti}_3\text{C}_2\text{T}_x\text{-Mg}^{2+}$ | $\text{Ti}_3\text{C}_2\text{T}_x\text{-Ca}^{2+}$ | $\text{Ti}_3\text{C}_2\text{T}_x\text{-Al}^{3+}$ |
|---------------------|-----------------------------------------------|----------------------------------------------|-------------------------------------------------|--------------------------------------------------|--------------------------------------------------|--------------------------------------------------|
| C-C 2p <sup>2</sup> | 46%                                           | 53%                                          | 71%                                             | 65%                                              | 66%                                              | 75%                                              |
| C-OH                | 7%                                            | 7%                                           | 4%                                              | 2%                                               | 7%                                               | 5%                                               |
| O=C-OH              | 1%                                            | 2%                                           | 6%                                              | 1%                                               | 4%                                               | 3%                                               |
| C-Ti                | 46%                                           | 38%                                          | 19%                                             | 32%                                              | 22%                                              | 18%                                              |

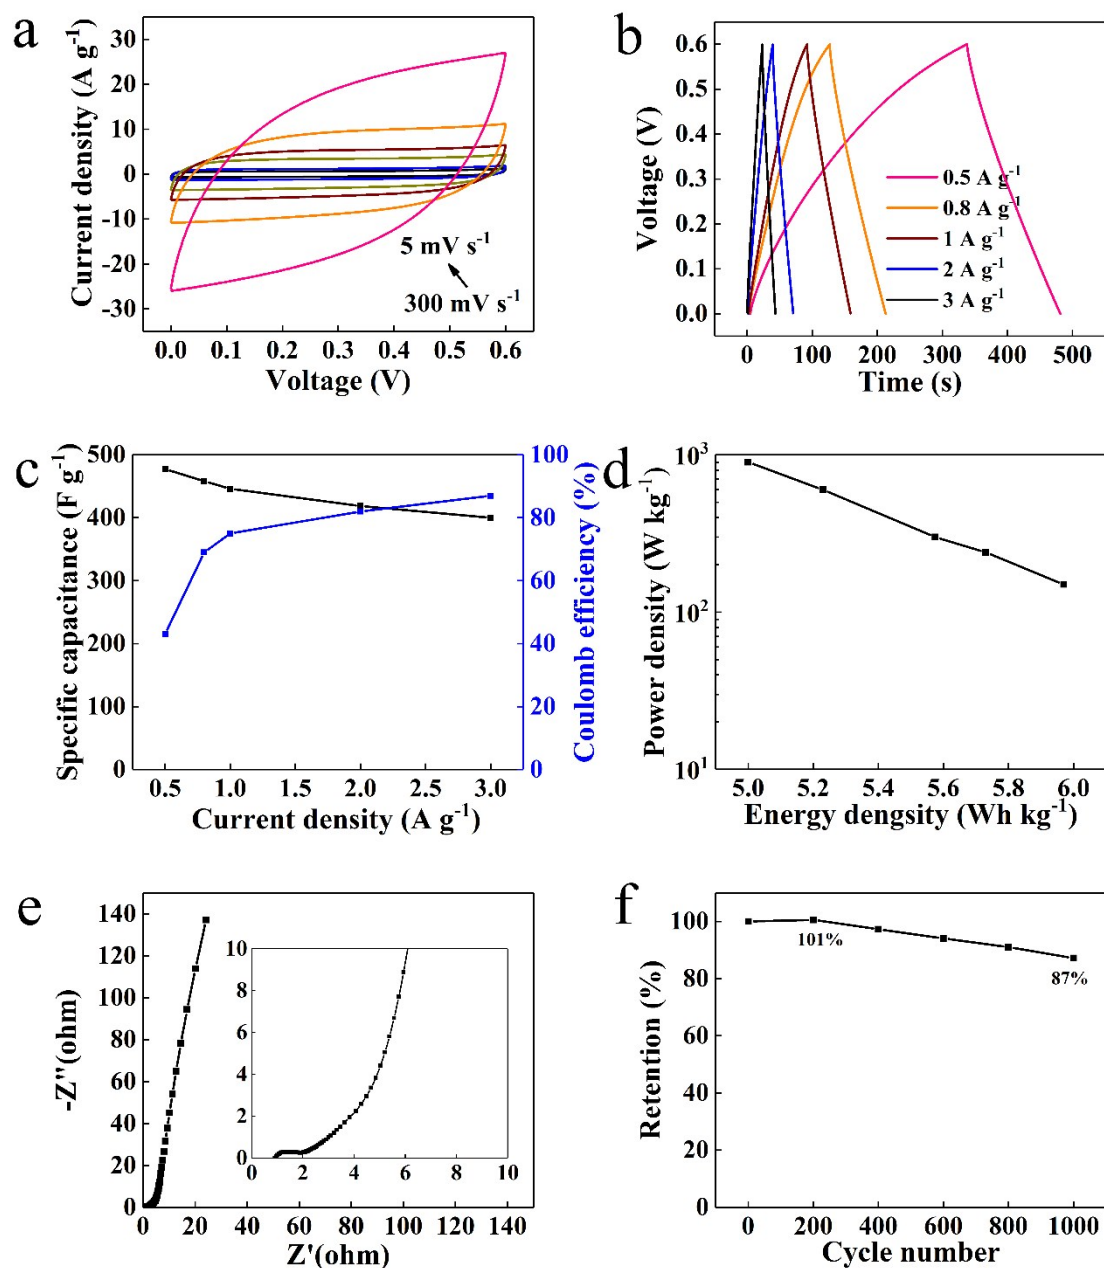

Fig. S3 Electrochemical performance of the  $\text{Ti}_3\text{C}_2\text{T}_x\text{-Al}^{3+}||\text{Ti}_3\text{C}_2\text{T}_x\text{-Al}^{3+}$  SC device in 1 M KOH electrolyte: (a) Cyclic voltammetric curves at various scan rates (5-300  $\text{mV s}^{-1}$ ), (b) Constant current charge-discharge curve at various current densities (0.5-3  $\text{A g}^{-1}$ ), (c) Specific capacitance and Coulomb efficiency vs. current densities (0.5-3  $\text{A g}^{-1}$ ), (d) Ragone plots, (e) The EIS curves, (f) Capacitance retention, of the symmetrical supercapacitor

Table S4 Comparison of electrochemical performance of  $\text{Ti}_3\text{C}_2\text{T}_x$  electrode

| Electrode material                                      | Specific capacitance   | Scan rate ( $\text{mV s}^{-1}$ ) | Electrolyte             | Ref.      |
|---------------------------------------------------------|------------------------|----------------------------------|-------------------------|-----------|
| $\text{Ti}_3\text{C}_2$                                 | $100 \text{ F g}^{-1}$ | 2                                | $\text{H}_2\text{SO}_4$ | 1         |
| $\text{Ti}_3\text{C}_2$                                 | $117 \text{ F g}^{-1}$ | 2                                | KOH                     | 2         |
| $\text{Ti}_3\text{C}_2$                                 | $70 \text{ F g}^{-1}$  | 20                               | EMITSI                  | 3         |
| $\text{Ti}_3\text{C}_2\text{T}_x$                       | $63 \text{ F g}^{-1}$  | 5                                | KOH                     | 4         |
| d- $\text{Ti}_3\text{C}_2\text{T}_x$ paper intercalated | $122 \text{ F g}^{-1}$ | 5                                | KOH                     | 4         |
| d- $\text{Ti}_3\text{C}_2\text{T}_x$ film on NF         | $140 \text{ F g}^{-1}$ | 5                                | KOH                     | 5         |
| $\text{TiO}_2\text{-Ti}_3\text{C}_2$                    | $143 \text{ F g}^{-1}$ | 5                                | KOH                     | 6         |
| Delaminated- $\text{Ti}_3\text{C}_2$                    | $150 \text{ F g}^{-1}$ | 5                                | $\text{H}_2\text{SO}_4$ | 7         |
| CNT- $\text{Ti}_3\text{C}_2$                            | $85 \text{ F g}^{-1}$  | 2                                | EMITSI                  | 8         |
| $\text{Ti}_3\text{C}_2$ -216h etching                   | $118 \text{ F g}^{-1}$ | 5                                | KOH                     | 9         |
| Li-intercalated $\text{Ti}_3\text{C}_2\text{T}_x$       | $134 \text{ F g}^{-1}$ | 20                               | KOH                     | 10        |
| $\text{Ti}_3\text{C}_2\text{T}_x\text{-Al}^{3+}$        | $154 \text{ F g}^{-1}$ | 5                                | KOH                     | This work |

Table S5 Bader charge distributions of different cations pillaring  $\text{Ti}_3\text{C}_2\text{T}_x$ 

| Cations                         | $\text{Al}^{3+}$ | $\text{NH}_4^+$ | $\text{Mg}^{2+}$ | $\text{K}^+$ | $\text{Ca}^{2+}$ | $\text{Li}^+$ |
|---------------------------------|------------------|-----------------|------------------|--------------|------------------|---------------|
| Bader charge of the nearest Ti  | 2.60             | 2.58            | 2.41             | 2.23         | 2.20             | 2.19          |
| Number of outer electrons of Ti | 4                | 4               | 4                | 4            | 4                | 4             |
| Charge transfer                 | 1.40             | 1.42            | 1.59             | 1.77         | 1.80             | 1.81          |

## References

1. Y. Dall'Agnese, M. R. Lukatskaya, K. M. Cook, P. L. Taberna, Y. Gogotsi and P. Simon, *Electrochem. Commun.*, 2014, **48**, 118-122.
2. S. Y. Lin and X. Zhang, *J. Power Sources*, 2015, **294**, 354-359.
3. Z. Lin, D. Barbara, P. L. Taberna, K. L. V. Aken, B. Anasori, Y. Gogotsi and P. Simon, *J. Power Sources*, 2016, **326**, 575-579.
4. G. Minoli, *Science*, 2013, **341**, 1502-1505.
5. S. Xu, G. Wei, J. Li, Y. Ji, N. Klyui, V. Izotov and W. Han, *Chem. Eng. J.*, 2017, **317**.
6. L. Sheng, L. Jiang, T. Wei and Z. Fan, *Small*, 2016, **12**, 5217-5227.
7. M. Ghidui, M. R. Lukatskaya, M. Q. Zhao, Y. Gogotsi and M. W. Barsoum, *Nature*, 2014, **516**, 78-81.
8. Y. Dall'Agnese, P. Rozier, P. L. Taberna, Y. Gogotsi and P. Simon, *J. Power Sources*, 2016, **306**, 510-515.
9. J. Zhu, Y. Tang, C. Yang, F. Wang and M. Cao, *J. Electrochem. Soc.*, 2016, **163**, A785-A791.
10. F. X. Wang, X. W. Wu, X. H. Yuan, Z. C. Liu, Y. Zhang, L. J. Fu, Y. S. Zhu, Q. M. Zhou, Y. P. Wu and W. Huang, *Chem. Soc. Rev.*, 2017, **46**, 6816-6854.
